# Supplementary material
Source: PubMed Central journal article supplement (PMC3113240)
Supplement: mmc1.pdf [file mmc1.pdf]

The American Journal of Human Genetics, Volume 88

**Supplemental Data**

**Hereditary Leukonychia, or Porcelain Nails,**

**Resulting from Mutations in *PLCD1***

**Maija Kiuru, Mazen Kurban, Munenari Itoh, Lynn Petukhova, Yutaka Shimomura, Muhammad Wajid, and Angela M. Christiano**

**a****Ala574Thr****Cys209Arg**

|              | 3' ←    | 5' → |           | 3' ←        | 5' → |
|--------------|---------|------|-----------|-------------|------|
| Human        | SSDTRWG | A    | PYIRSLHGV | ELSDTQSHDC  | E    |
| Chimp        | SSDTRWG | A    | PYIRSLHGV | ELSDTQSHDC  | E    |
| Gorilla      | SSDTRWG | A    | PYIRSLHGV | ELSDTQSHDC  | E    |
| Rhesus       | SSDTRWG | A    | PYIRSLHGV | ELSDTQSRDC  | E    |
| Baboon       | SSDTRWG | A    | PYIRSLHGV | ELSDTQSRDC  | E    |
| Mouse        | SSDTRWG | A    | PYIRSLHGV | ELSDTQSHDC  | E    |
| Rat          | SSDTRWG | A    | PYIRSLCSV | ELSDTQSHDC  | E    |
| Guinea-Pig   | SSDTRWG | A    | PYIRSLHGV | ELSDTQSHDC  | E    |
| Cow          | SSDTRWG | A    | PYIRSLH—V | ELSDTQSHDC  | E    |
| Horse        | SSDTRWG | A    | PYIRSLHGV | ELSDTQSHDC  | E    |
| Dog          | SSDTRWG | A    | PYIRSLH—V | ELSDTQSHDC  | E    |
| Elephant     | SSDTRWG | A    | PYIRSLHGV | ELSDTQSRDC  | E    |
| Chicken      | SSDTRWG | A    | PYIRSLHRI | ELAETKSKDC  | Y    |
| X-Tropicalis | SSDTRFG | D    | PYIRTLQRT | ELTGSQSKDC  | H    |
| Zebrafish    | SSDTRSG | A    | PYIRSLKDI | ELTGS—STDCK |      |

**b**

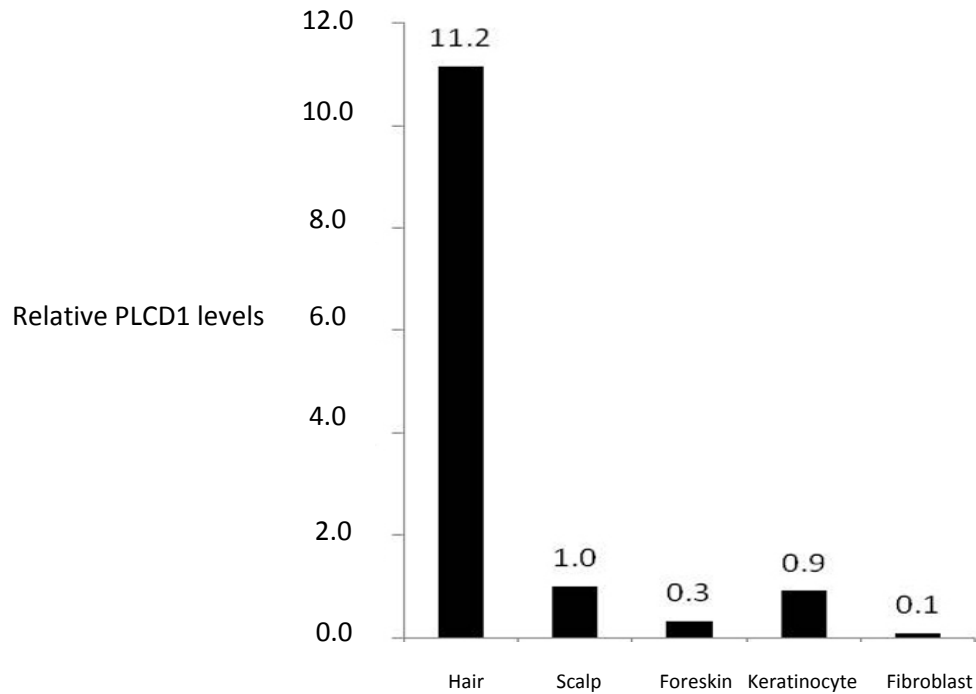

**Figure S1:** (a) The amino acid Ala574 is highly conserved across diverse vertebrate species and lies in PI-PLC Y-box . This region is highly conserved among the different isoforms of phospholipases and is important for the enzymatic catalytic activity. The amino acid Cys209 is highly conserved in many organisms and lies in the EF-hand domain which is present in many calcium-binding proteins.(b) PLCD1 levels as measured from several body sites, and in keratinocytes and fibroblasts.

**Table S1.** Primers used in the study. Primers to amplify additional microsatellite markers

| Primer name                               | Forward primer                | Reverse primer              | Product size (bp) |
|-------------------------------------------|-------------------------------|-----------------------------|-------------------|
| CTDSPL                                    | GTCGATATAAGAAACAACCCTAAC<br>C | CAGCACAAAAGCTGCATATACT<br>G | 102               |
| DLEC                                      | GGGCAAAATGGTGAAATCTGATC       | CATGCCACCACACTCAGCTA        | 112               |
| Primers to amplify PLCD1 from genomic DNA |                               |                             |                   |
| PLCD1 -1                                  | CTAGCTCCTCCCTCCCATTC          | TAAAGGCTCCAAGGCAAATG        | 363               |
| PLCD1 -2                                  | ATGAGGCTGGTGAAAAGTGG          | CCCATCTGTGGTTTTGATCC        | 379               |
| PLCD1 -3                                  | GGGACTGACCTCACAGCATT          | TTATGGCAGCCCAAAGTACC        | 394               |
| PLCD1 -4-5                                | GGGACCTTGGTAGGTTCCAG          | TCTTCTGGCTGCAGTCTCC         | 598               |
| PLCD1 -6-7                                | CTGGAAGACTGGCTCAGGAC          | CACCCCTAGCATCCCACTC         | 599               |
| PLCD1 -8-9                                | AGGTGAGGAGTGGGATGCTA          | GCAGCCACAGAGAAGTGA          | 553               |
| PLCD1 -10-11                              | CCTACCCTACCCCAACCACT          | CTTGGGACTGAAACCCTCCT        | 494               |
| PLCD1 -12-13                              | GCCCTGCTAACTCACCATGT          | CCATATCAGCAGCATGGACA        | 567               |
| PLCD1 -14                                 | GTCCCCCTAGGTAGGTGCTG          | GCAGGAGGGAACACAGAGAG        | 371               |
| PLCD1 -15                                 | GCCGAATGACCAGAACTCTC          | GGAATGAAGGACAGCTCCAG        | 334               |
